# Supplementary material for: Quantitative Profiling of Oxylipin Reveals the Mechanism of Pien-Tze-Huang on Alcoholic Liver Disease
Source: Hindawi journal article supplement (doi:10.1155/2021/9931542), 2021-06-01
Supplement: f1 [file 9931542.f1.zip]

## Supplementary file 2

22 and 16 different oxylipin-metabolites were showed in the model group compared with the control group, and the PZH-H group compared with the model group, respectively.

### Model vs Control

| Class | Metabolite         | P        | FDR      | FC       | log2FC   | VIP         |
|-------|--------------------|----------|----------|----------|----------|-------------|
| EPA   | 18-HETE            | 0.002943 | 0.011417 | 2.133382 | 1.093143 | 1.427688847 |
| EPA   | 17-HETE            | 0.037918 | 0.095618 | 1.735887 | 0.795673 | 1.059880581 |
| LA    | 13-oxoODE          | 0.018044 | 0.058142 | 1.281513 | 0.357848 | 1.211929252 |
| EPA   | 15-HEPE            | 0.000155 | 0.001502 | 2.47929  | 1.309927 | 1.470827013 |
| EPA   | 12-HEPE            | 0.001088 | 0.005736 | 2.704819 | 1.435532 | 1.513395351 |
| EPA   | 5-HEPE             | 0.000155 | 0.001502 | 2.83825  | 1.505002 | 1.511629163 |
| EPA   | EPA                | 0.000155 | 0.001502 | 2.039604 | 1.028289 | 1.65209901  |
| DHA   | DHA                | 0.001088 | 0.005736 | 1.623596 | 0.699192 | 1.439910345 |
| DHA   | 4-HDHA             | 0.001616 | 0.007812 | 2.82273  | 1.497091 | 1.675761154 |
| DHA   | 7-HDHA             | 0.000622 | 0.004006 | 2.567308 | 1.360256 | 1.545721899 |
| DHA   | 14(S)-HDHA         | 0.000622 | 0.004006 | 2.281787 | 1.190164 | 1.632493436 |
| DHA   | 17-HDHA            | 0.004662 | 0.0169   | 2.782294 | 1.476275 | 1.485835109 |
| DHA   | RvD2               | 0.035556 | 0.095618 | 1.787365 | 0.837834 | 1.100355698 |
| LA    | LTB4               | 0.002953 | 0.011417 | 1.827309 | 0.869721 | 1.225782805 |
| LA    | Z,11Z,14Z,17Z-eico | 0.000311 | 0.002575 | 2.960945 | 1.566057 | 1.678973419 |
| EPA   | 9,10-EpOME         | 0.000147 | 0.001502 | 1.486664 | 0.572079 | 1.55136128  |
| DHA   | 12,13-EpOME        | 0.002482 | 0.011075 | 1.397948 | 0.483311 | 1.312873497 |
| LA    | 9-HOTrE            | 0.000155 | 0.001502 | 2.685345 | 1.425107 | 1.810016764 |
| LA    | 13-HOTrE           | 0.000155 | 0.001502 | 2.027125 | 1.019435 | 1.770831487 |
| DHA   | RvD5               | 0.010051 | 0.034291 | 3.21651  | 1.685496 | 1.277079374 |
| DHA   | PDX                | 0.020769 | 0.063399 | 2.795485 | 1.483098 | 1.37901668  |
| DGLA  | PGE2               | 0.02282  | 0.066177 | 0.220679 | -2.17998 | 1.13067223  |

### PZH-H vs Model

| Class | Metabolite           | P        | FDR      | FC       | log2FC   | VIP      |
|-------|----------------------|----------|----------|----------|----------|----------|
| AA    | 19(S)-HETE           | 0.020727 | 0.100180 | 1.692068 | 0.758788 | 1.241024 |
| EPA   | 17-HETE              | 0.030620 | 0.122095 | 1.574488 | 0.654883 | 1.438892 |
| EPA   | 18-HEPE              | 0.020668 | 0.100180 | 2.701357 | 1.433685 | 1.096781 |
| EPA   | 15-HEPE              | 0.020668 | 0.100180 | 1.431981 | 0.518012 | 1.013007 |
| LA    | no-gamma-Linolenic   | 0.009135 | 0.075686 | 1.478515 | 0.564149 | 1.546600 |
| LA    | Linoleic acid        | 0.000470 | 0.013627 | 1.515343 | 0.599644 | 1.808107 |
| LA    | alpha-Linolenic acid | 0.003954 | 0.057336 | 1.553020 | 0.635077 | 1.793215 |
| LA    | gamma-Linolenic acid | 0.016507 | 0.100180 | 1.440157 | 0.526226 | 1.546347 |
| AA    | 9,10-DiHOME          | 0.000013 | 0.000772 | 2.055308 | 1.039355 | 1.887135 |
| LA    | Z,11Z,14Z,17Z-eico   | 0.002953 | 0.057084 | 2.665644 | 1.414484 | 1.914047 |
| LA    | 5S,15S-DiHETE        | 0.005451 | 0.060920 | 1.580919 | 0.660764 | 1.289418 |
| LA    | 5,6-DiHETrE          | 0.033681 | 0.122095 | 1.433813 | 0.519856 | 1.507663 |
| LA    | 9-HOTrE              | 0.012600 | 0.091352 | 1.625732 | 0.701090 | 1.562081 |
| LA    | 13-HOTrE             | 0.006302 | 0.060920 | 1.554011 | 0.635997 | 1.812153 |

|      |      |          |          |          |           |          |
|------|------|----------|----------|----------|-----------|----------|
| DGLA | PGE2 | 0.032474 | 0.122095 | 0.181818 | -2.459432 | 1.211364 |
| LA   | LTD4 | 0.032474 | 0.122095 | 0.181818 | -2.459432 | 1.153951 |
