# Supplementary material for: Quantitative Profiling of Oxylipin Reveals the Mechanism of Pien-Tze-Huang on Alcoholic Liver Disease
Source: Hindawi journal article supplement (doi:10.1155/2021/9931542), 2021-06-01
Supplement: f1 [file 9931542.f1.zip]

Supplementary file 1  
The levels of oxylipin-metabolites were showed among three groups.

| Metabolite       | Control.Mean | Control.SD  | Model.Mean | Model.SD   | PZH-H.Mean | PZH-H.SD    |
|------------------|--------------|-------------|------------|------------|------------|-------------|
| 20-HETE          | 0.0111975    | 0.004276359 | 0.01130625 | 0.00532958 | 0.016875   | 0.005806093 |
| 5-HETE           | 1.8575       | 0.403334317 | 2.01375    | 0.63053124 | 2.28875    | 0.540223168 |
| 19(S)-HETE       | 0.0483625    | 0.014078955 | 0.0802125  | 0.03699117 | 0.135725   | 0.047021933 |
| 18-HETE          | 0.051075     | 0.017346037 | 0.1089625  | 0.03791697 | 0.147925   | 0.035688964 |
| 17-HETE          | 0.05275      | 0.017885828 | 0.0922125  | 0.04214171 | 0.1451875  | 0.045847525 |
| 16-HETE          | 0.0377125    | 0.011817715 | 0.031825   | 0.01382728 | 0.043875   | 0.01070257  |
| 15-HETE          | 1.9925       | 0.424491292 | 2.065      | 0.85306171 | 2.325      | 0.640646994 |
| 12-HETE          | 2.20375      | 0.635181358 | 2.18875    | 0.73884925 | 2.95375    | 1.435279341 |
| 11(S)-HETE       | 1.1965       | 0.313167231 | 1.314875   | 0.42410761 | 1.4225     | 0.27525313  |
| 9-HETE           | 1.004375     | 0.322411422 | 1.270125   | 0.68804702 | 1.291375   | 0.309013609 |
| 14,15-EET        | 0.2685       | 0.058331565 | 0.219      | 0.06924284 | 0.2105     | 0.039478747 |
| 11,12-EET        | 0.18345      | 0.042480483 | 0.1673125  | 0.04523979 | 0.172375   | 0.034969119 |
| 8,9-EET          | 0.1110375    | 0.023826272 | 0.12485    | 0.03343664 | 0.1329     | 0.032960062 |
| 5,6-EET          | 7.41625      | 1.819622704 | 6.42875    | 2.91938564 | 8.81375    | 3.278762561 |
| 9-oxoODE         | 2.215        | 0.704617424 | 2.845      | 0.87948037 | 3.62875    | 1.40619484  |
| 13-oxoODE        | 1.178125     | 0.119281704 | 1.505      | 0.28334734 | 1.8525     | 0.536809357 |
| 18-HEPE          | 0.1081625    | 0.046026916 | 0.1573125  | 0.09482374 | 0.2705     | 0.104543907 |
| 15-HEPE          | 0.0338       | 0.007576279 | 0.0891     | 0.03772407 | 0.1308875  | 0.046319617 |
| 12-HEPE          | 0.0955375    | 0.047450514 | 0.256875   | 0.10906543 | 0.579      | 0.457724808 |
| 5-HEPE           | 0.0520375    | 0.013509567 | 0.1596375  | 0.07656332 | 0.233875   | 0.069107447 |
| EPA              | 25.4125      | 5.336782739 | 52.1625    | 13.0992843 | 63.7375    | 19.19389319 |
| AA               | 35.7875      | 31.14571456 | 22.60875   | 16.5776523 | 35.05      | 22.12496973 |
| DHA              | 998.625      | 240.1897687 | 1530       | 286.256628 | 1628.75    | 258.3152835 |
| α-gamma-Linolen  | 174.5        | 36.04362436 | 149.8125   | 36.0851547 | 221.5      | 54.62861626 |
| Linoleic acid    | 140.4375     | 27.83810018 | 118.95     | 27.2308648 | 180.25     | 26.87404483 |
| γ-linolenic acid | 42.5875      | 12.16534158 | 55.875     | 17.5830072 | 86.775     | 18.29143047 |
| α-linolenic acid | 39.85        | 7.884704904 | 38.225     | 9.28620328 | 55.05      | 14.3438389  |
| 4-HDHA           | 8.28625      | 3.482441416 | 26.375     | 11.6746061 | 28.4375    | 10.27867939 |
| 7-HDHA           | 4.2575       | 1.856492469 | 11.3725    | 4.97941118 | 11.71125   | 4.922483222 |
| 14(S)-HDHA       | 13.96        | 4.821413545 | 34.15      | 12.6743836 | 38.4125    | 18.36576298 |
| 17-HDHA          | 5.0025       | 2.677017263 | 15.5375    | 7.22512036 | 20.13875   | 16.41482991 |
| RvD2             | 0.000991725  | 0.000667053 | 0.00230625 | 0.00159601 | 0.00226475 | 0.001136276 |
| PGD1             | 0.18025      | 0.043506157 | 0.191375   | 0.07147215 | 0.180125   | 0.058403614 |
| 6-Keto-PGF1α     | 0.878        | 0.32176966  | 0.8965     | 0.5109171  | 0.578      | 0.232293534 |
| PGF2α            | 0.85975      | 0.31525126  | 0.68075    | 0.24022177 | 0.6935     | 0.249349439 |
| PGF1α            | 0.191375     | 0.069691027 | 0.183625   | 0.03994975 | 0.200875   | 0.05666805  |
| PGJ2             | 0.89075      | 0.333553915 | 0.93575    | 0.60370351 | 0.860625   | 0.201633286 |
| LTB4             | 0.0130575    | 0.005064797 | 0.0269     | 0.01344385 | 0.029625   | 0.011343689 |
| TXB2             | 0.344625     | 0.118191053 | 0.313625   | 0.16544048 | 0.255125   | 0.118127579 |
| Lipoxin A4       | 0.06395      | 0.012370703 | 0.08965    | 0.04284694 | 0.1240375  | 0.045249718 |
| 9,10-DiHOME      | 1.042        | 0.230840081 | 1.06675    | 0.23681382 | 2.1925     | 0.378295047 |
| 16(17)-EpDPE     | 0.08045      | 0.033007921 | 0.105775   | 0.04588538 | 0.136375   | 0.047875337 |
| 5-HETrE          | 0.0987625    | 0.079397984 | 0.151375   | 0.1137954  | 0.1714     | 0.118639875 |
| 11Z,14Z,17Z-eic  | 0.559625     | 0.23229657  | 1.895      | 0.72377976 | 4.33875    | 1.656626844 |

|               |             |             |            |            |             |             |
|---------------|-------------|-------------|------------|------------|-------------|-------------|
| 5S,15S-DiHETE | 0.040625    | 0.015518261 | 0.0470375  | 0.01569558 | 0.0743625   | 0.01748795  |
| 5-oxoETE      | 1.2495      | 0.24942448  | 1.624      | 1.00504342 | 1.65875     | 0.3632566   |
| 15-oxoETE     | 0.7785      | 0.135744508 | 0.865375   | 0.33789683 | 0.923375    | 0.234715595 |
| 5,6-DiHETrE   | 0.1006      | 0.037737287 | 0.1260625  | 0.02867109 | 0.18075     | 0.056380721 |
| 9,10-EpOME    | 0.304625    | 0.055597887 | 0.452875   | 0.05928488 | 0.537       | 0.092939304 |
| 12,13-EpOME   | 0.341125    | 0.061182251 | 0.476875   | 0.08232937 | 0.5355      | 0.072111026 |
| 9-HOTrE       | 0.0359      | 0.010141992 | 0.1002625  | 0.02593519 | 0.163       | 0.052704025 |
| 13-HOTrE      | 0.025825    | 0.006299603 | 0.0593625  | 0.01614222 | 0.09225     | 0.023328523 |
| RvD5          | 0.0013489   | 0.001088776 | 0.00433875 | 0.00242011 | 0.00551375  | 0.003541008 |
| PDX           | 0.0796625   | 0.043784535 | 0.237      | 0.15003904 | 0.2745      | 0.25821807  |
| PGE1          | 0.002751925 | 0.002396493 | 0.00710053 | 0.00898259 | 0.003590125 | 0.005760891 |
| PGE2          | 0.2365      | 0.044612618 | 0.1031875  | 0.12038879 | 0.00975     | 0           |
| LTD4          | 0.0034875   | 0.003062067 | 0.00201438 | 0.00309215 | 7.25E-05    | 0           |
| LXA5          | 0.03123     | 0.043619528 | 0.0594     | 0.07449123 | 0.00824     | 0           |
